# Supplementary material
Source: publisher figshare collection journal article supplement (https://acs.figshare.com/ndownloader/files/12188747)
Supplement: Supplementary file 1 [file 12188747]

**Deciphering protein *O*-glycosylation: solid-phase chemoenzymatic cleavage and enrichment**

Running title: Solid-phase chemoenzymatic digestion on *O*-glycosylation

Shuang Yang1*, Philip Onigman2, Wells W. Wu3, Jonathan Sjogren2, Helen Nyhlen4, Rong-Fong Shen3, John Cipollo1*

1 Laboratory of Bacterial Polysaccharides, Division of Bacterial, Parasitic and Allergenic Products, Center for Biologics Evaluation and Research, Food and Drug Administration, Silver Spring, MD 20993, USA

2 Genovis Inc., Cambridge, MA 02142, USA

3 Facility for Biotechnology Resources, Center for Biologics Evaluation and Research, Food and Drug Administration, Silver Spring, MD 20993, USA

4 Genovis AB, Box 790, SE-220 07 Lund, Sweden

**Abstract**

Glycosylation plays a critical role in the biosynthetic-secretory pathway in the endoplasmic reticulum (ER) and Golgi apparatus. Over 50% of mammalian cellular proteins are typically glycosylated and this modification is involved in a wide range of biological functions such as barrier formation against intestinal microbes and serving as signaling molecules for selectins and galectins in the innate immune system. *N*-linked glycosylation analysis has been greatly facilitated owing to a range of specific enzymes available for their release. However, system-wide analysis on *O*-linked glycosylation remains a challenge due to the lack of equivalent enzymes and the inherent structural heterogeneity of *O*-glycans. Although *O*-glycosidase can catalyze the removal of Core 1 and Core 3 *O*-linked disaccharides from glycoproteins, analysis of other types of *O-*glycans remains difficult, particularly when residing on glycopeptides. Here we describe a novel chemoenzymatic approach driven by a newly available *O-*protease and solid phase platform. This method renders the assignment of *O*-glycosylated peptides, *N*-glycan profile, sialyl *O*-glycopeptides linkage, and mapping of heterogenous *O*-glycosylation. For the first time, we can analyze intact *O*-glycopeptides generated by *O*-protease and enriched using a solid-phase platform. We establish the method on standard glycoproteins, confirming known *O-*glycosites with high accuracy and confidence, and reveal up to eight-fold more glycosites than previously reported with concomitant increased heterogeneity. This technique is further applied for analysis of Zika virus recombinant glycoproteins, revealing their dominant *O*-glycosites and setting a basis set of *O*-glycosylation tracts in these important viral antigens. Our approach can serve as a benchmark for the investigation of protein *O*-glycosylation in diseases and other biomedical contexts. This method should become an indispensable tool for investigations where *O*-glycosylation is central.

**Table of Contents**

Supplementary Figure S1-----------------------------------------------------------------------------------------S-3

Supplementary Figure S2-----------------------------------------------------------------------------------------S-4

Supplementary Figure S3-----------------------------------------------------------------------------------------S-5

Supplementary Figure S4-----------------------------------------------------------------------------------------S-6

**Supplementary Figure S1. Mucin-type O-glycoprotein with highly O-glycan decorated domain.**


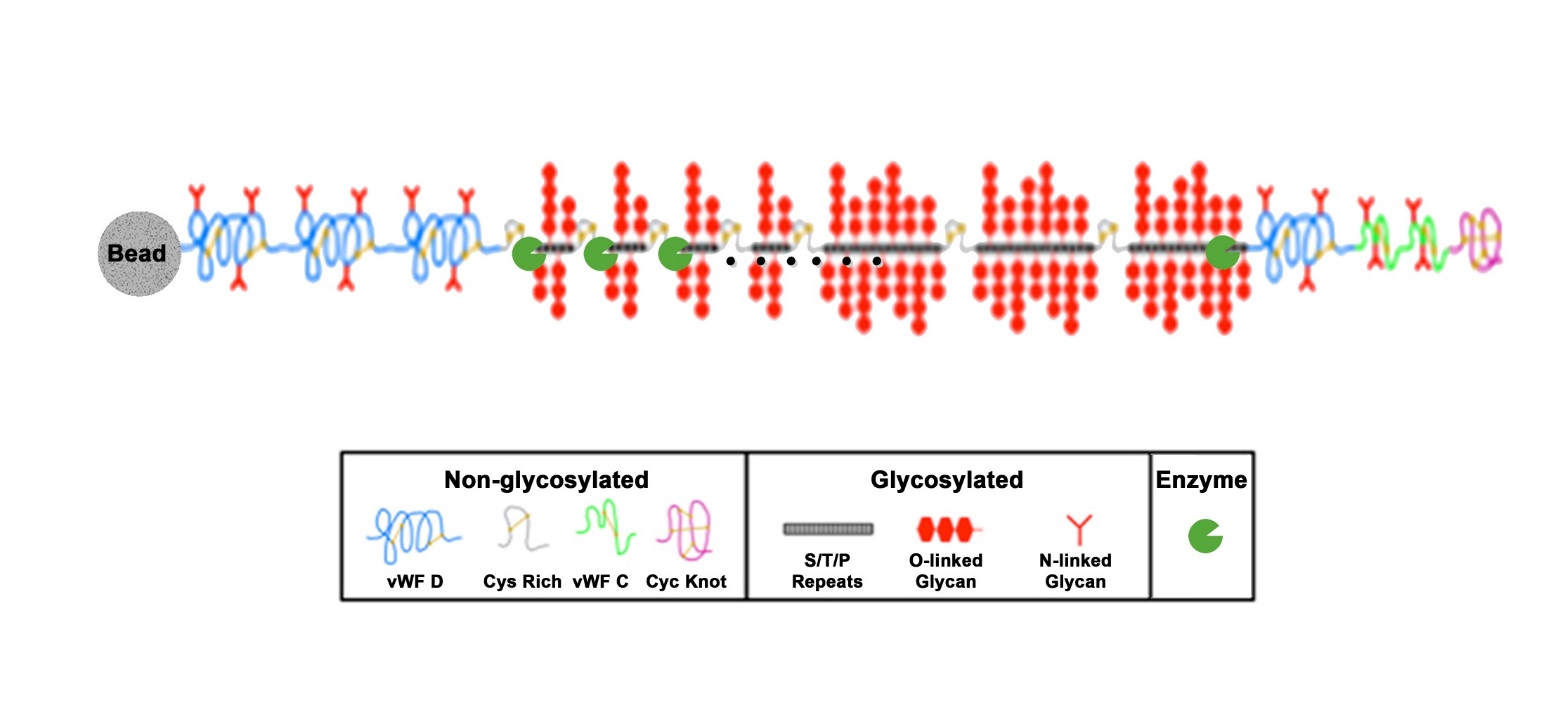


**Supplementary Figure S2. Digest of O-glycopeptide H2N-APPRLI…SPPDAA125S126[HexHexNAc]AAPLR…ACRTGD-COOH by OpeRATOR. After operator digestion, the peptide was cleaved on the peptide bond N-terminal between AA125 and AA126.**


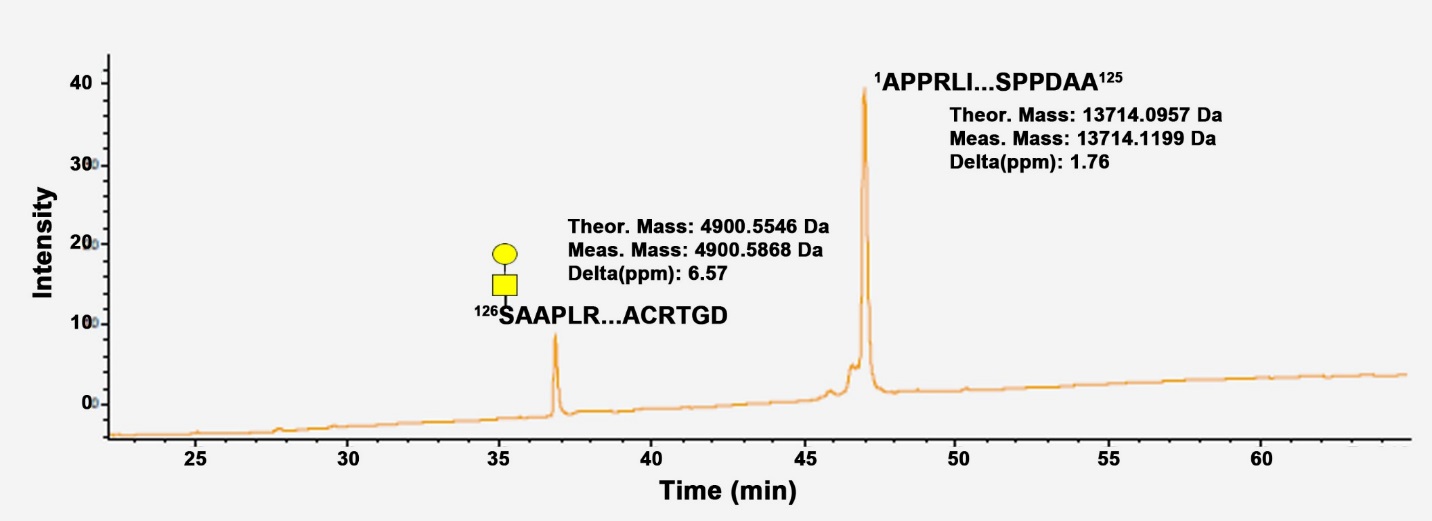

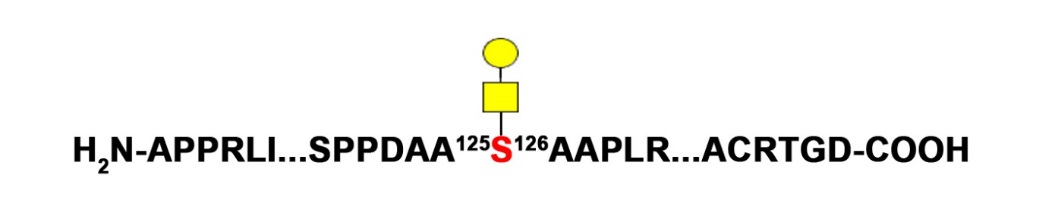


**Supplementary Figure S3. OpeRATOR digestion on glycosylated and non-glycosylated proteins. Fetuin and IgA are both N- and O-linked glycoproteins, while IgG is N-linked glycoprotein and Albumin has no glycosites. OpeRATOR only digests O-glycosylated glycoproteins of Fetuin and IgA.**


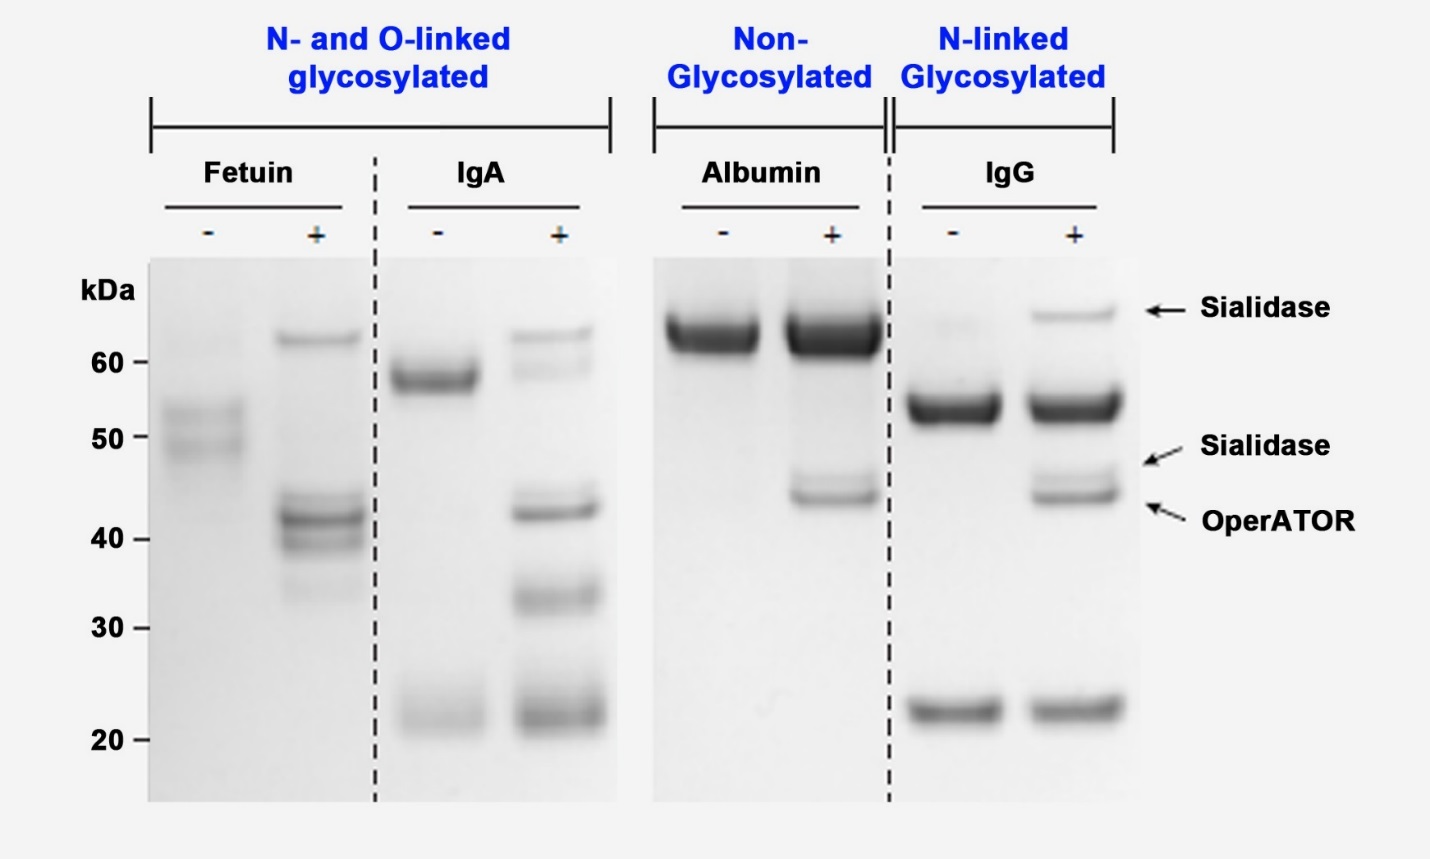


**Supplementary Figure S4. Tandem mass spectrometry of O-glycopeptides digested from Bovine Fetuin. (a) HILIC/Solution/PF/Op, (b) HILIC/Solid/PF/Op, (c) C18/Solution/PF/Op, (d) C18/Solid/PF/Op, (e) HILIC/Solution/PF, and (f) C18/Solution/PF.**

**
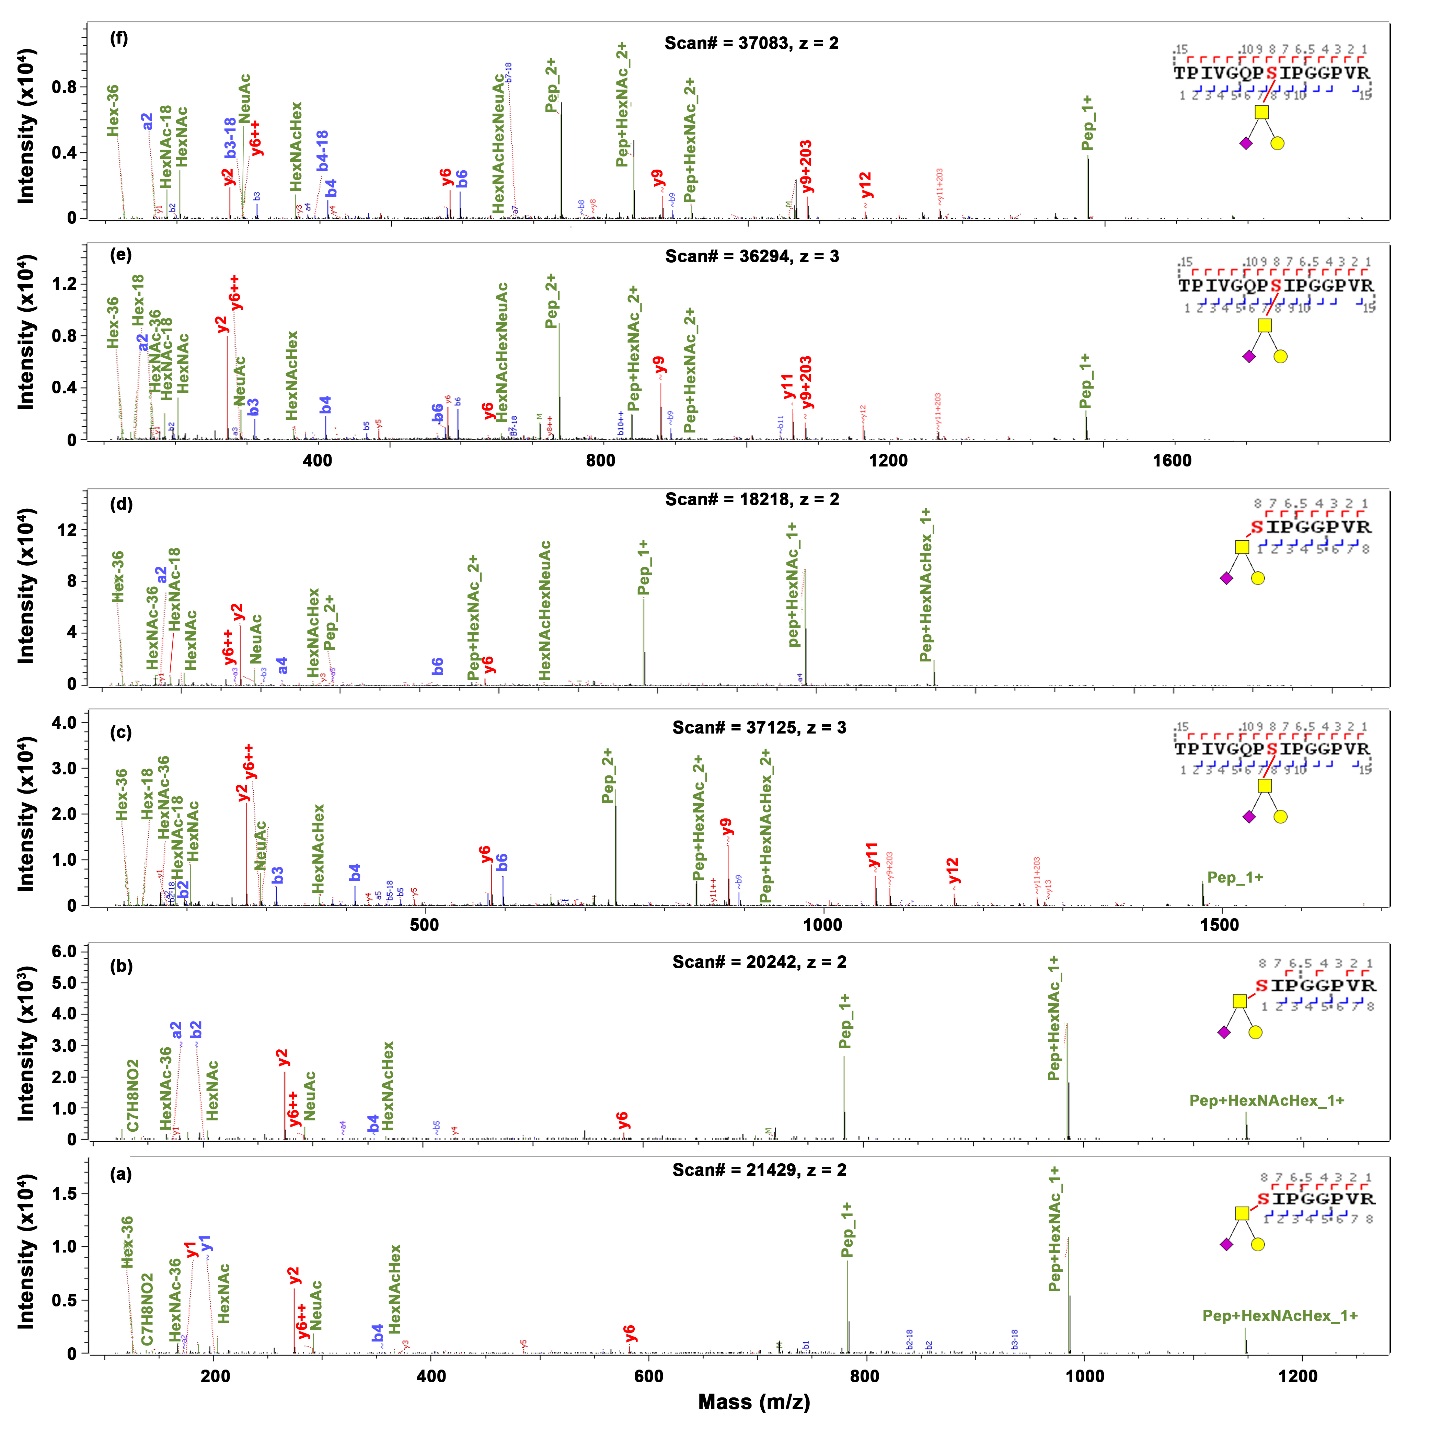
**
